# Supplementary material
Source: ML conference proceedings conference paper supplement (https://proceedings.neurips.cc/paper_files/paper/2007/hash/b73ce398c39f506af761d2277d853a92-Abstract.html)
Supplement: Supplementary file 2 [file b73ce398c39f506af761d2277d853a92-Supplemental.zip]

# Bayesian binning beats approximate alternatives: estimating peri-stimulus time histograms.

Poster ID W13

*D. Endres, M. Oram, J. Schindelin and P. Földiák*

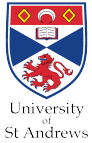

The alternatives  
Ours

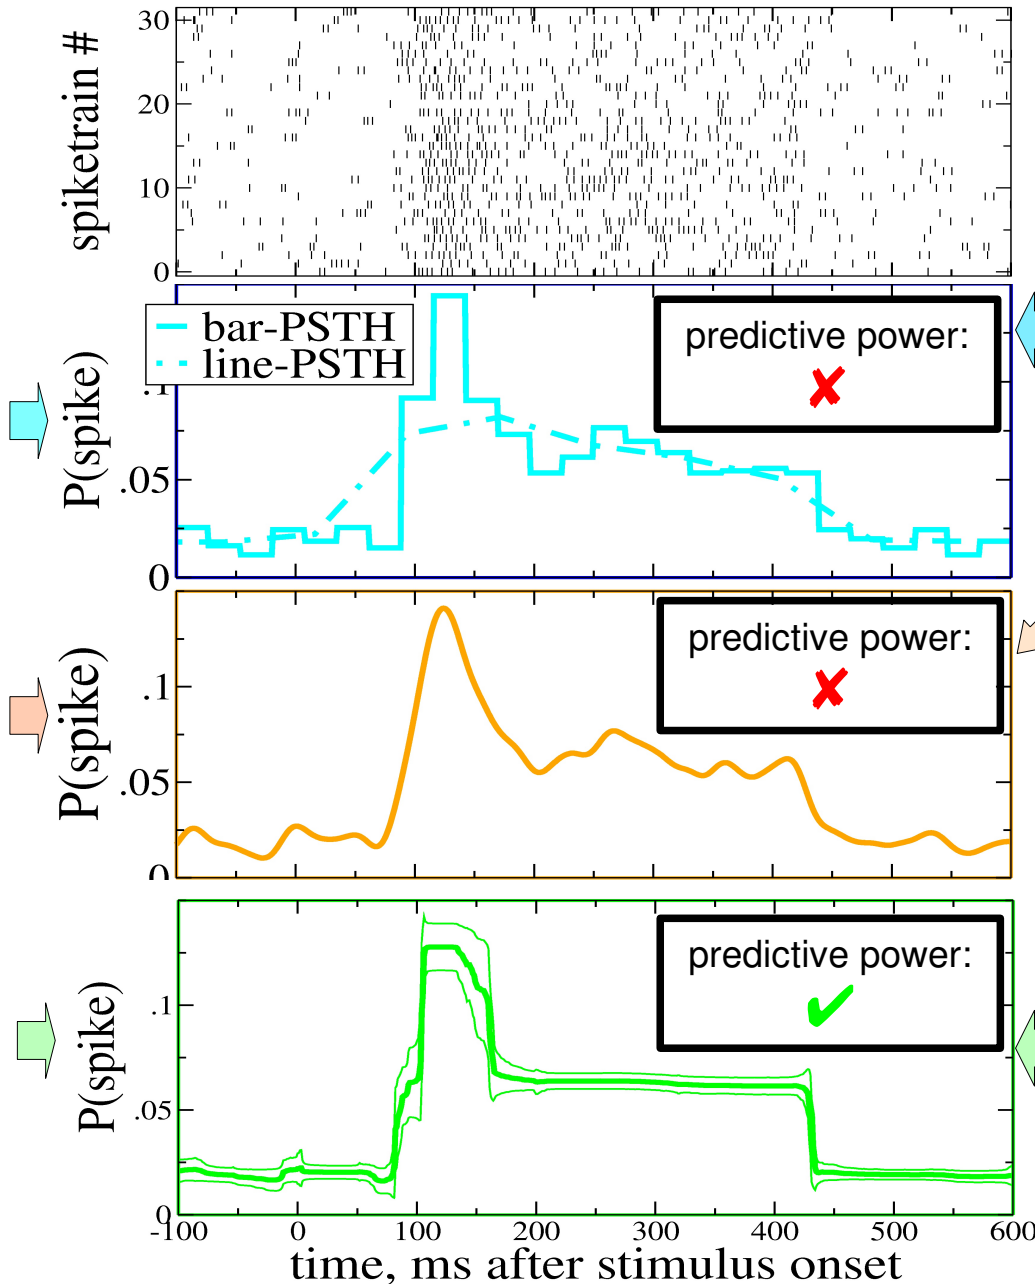

**Objective:** model *instantaneous firing rates* from *neural spike trains* as a function of time.

**Fixed boundary histogram approach**  
(Shimazaki & Shinomoto, *Neu. Comp.*, 2007)

**Spike density function by smoothing spike trains with a Gaussian kernel.**

**Bayesian binning for peri-stimulus time histogram (PSTH):** iterates over *all* possible binnings.

- Computes *Bayesian expectations*
- Yields *error bars* on predictions
- Provides *complexity control* via model comparison,
- *Only* cubic effort for *exact inference* !!
- *Better predictor* of *real neural data* than alternative approaches above.
